# Supplementary material
Source: publisher site journal article supplement (http://www.apsnet.org/meetings/mtngwshops/NPDRS/Documents/2006/Appendix5.1.pdf)
Supplement: Supplementary file 1 [file Appendix5.1.pdf]

## SOME POTENTIAL PATHOGENS TO CONSIDER FOR RESPONSE PLANNING

D. Huber

### Memphis NPDRS Breakout Results

Note: Pathogens on the Select Agents' list are not included below because plans are currently being prepared for each of those organisms. Organisms with an \* before them are nominated for the next round of recovery plans and those with a "?" after them are those for which we didn't have enough information to assign a priority.

#### Fungi:

- \**Cephalosporium maydis* (late wilt of corn)
- Cochliobolus miyabeanus* (rice brown spot) ?
- Colletotrichum gossypii* var *cephalosporioides* ?
- Fusarium oxysporum*, Australian new strain (cotton wilt) ?
- Glomerella gossypii* (cotton anthracnose) ?
- Physospora zea* (gray ear rot of corn) ?
- \**Pyrenochaeta glycines* (red leaf blotch of soybean)
- \**Pyricularia grisea* (wheat blast, leaf blight)
- Pyricularia oryzae* (rice blast) - new strains ?
- Sphaceloma glycine* (soybean scab) ?
- \**Thecaphora solani* (potato smut)
- Phytophthora kernoviae* - tree pathogen ?
- Dactulocheata glycines* (red leaf blotch of soybean) ?

#### Bacteria:

- \**Acidovorax avenae* ssp. *avenae* (bacterial brown stripe of rice)
- Burkholderia glumi* (bacterial glum rot of rice)(present in AR now) ?
- Corynebacterium insidiosum* (potato ring rot) - low priority, but important
- Xanthomonas albilineans*
- Xanthomonas campestris* pv. *citrumelo* (citrus bacterial spot) ?
- Xanthomonas campestris* pv. *malvacearium* ?
- Xanthomonas vasculorum* (bacterial blight of sugarcane)
- Xylophilus ampelinus* (bacterial blight of grape) ? (low)
- \*Apple proliferation (Phytoplasma)
- Flavescence doree* (phytoplasma - grapevines) ?
- \*Slime disease of grasses

#### Viruses:

- African stunt virus (needs vector) ?
- Citrus chlorotic dwarf virus (CCD) ?
- \*Citrus tristeza closterovirus (CTV) - new strain, Brazil
- Groundnut rosette virus ?
- Potato virus Y, NTN strain ?
- Soybean dwarf virus ?
- Wheat dwarf geminivirus ?
- Rhizmania of sugarbeet ? - new strain

New strain of cowpea mild mottle virus on soybean (seedborne, white fly vectored) ?

Tomato yellow leaf curl virus (Israel isolate) white fly vectored (not on potato)

Nematodes:

Mediterranean cereal cyst nematode (here) ?
